# Supplementary material for: Post‐Intracranial Hemorrhage Antithrombotic Therapy in Patients With Atrial Fibrillation
Source: PubMed Central journal article supplement — J Am Heart Assoc. 2022 Mar 4;11(6):e022849. doi: 10.1161/JAHA.121.022849 (PMC9075312; doi:10.1161/jaha.121.022849), 2022-03-04

# **SUPPLEMENTAL MATERIAL**

**Table S1. Diagnosis Codes for Inclusion and Exclusion Criteria.**

| <b>Condition</b>                    | <b>ICD-9-CM</b>                                                                                                                             | <b>ICD-10-CM</b>                   |
|-------------------------------------|---------------------------------------------------------------------------------------------------------------------------------------------|------------------------------------|
| <b>Inclusion criteria</b>           |                                                                                                                                             |                                    |
| Atrial fibrillation                 | 427.31                                                                                                                                      | I48                                |
| Intracranial bleeding               | 430, 431, 432                                                                                                                               | I60, I61, I62                      |
| <b>Exclusion criteria</b>           |                                                                                                                                             |                                    |
|                                     | 394.0, 394.2, 396.0, 396.1, 746.5                                                                                                           | I05.0, I05.2, I08.0, Q23.2         |
| Mitral stenosis                     |                                                                                                                                             |                                    |
| Artificial valve replacement        | V42.2, V43.3<br>NHI codes: FHV01, FHV02                                                                                                     | Z95.3, Z95.4, Z95.2                |
| Pregnancy                           | V22, V23<br>V45.1, V56                                                                                                                      | Z34, Z33.1, Z33.3<br>Z99.2, Z91.15 |
| Dialysis                            | NHI codes: 58001C, 58018C, 58025C, 58027C, 58029C, 58007C, 58014C, 58026C, 58030B, 58002C, 58009A/B, 58010A/B, 58011A/C, 58012A/B, 58017B/C |                                    |
| Malformation of precerebral vessels | 747.89                                                                                                                                      | Q28.0, Q28.1                       |
| Malformation of cerebral vessels    | 747.81                                                                                                                                      | Q28.2, Q28.3                       |
| Dissection of cerebral arteries     | 443.29                                                                                                                                      | I67.0                              |
| Cerebral aneurysm                   | 437.3                                                                                                                                       | I67.1                              |
| Moyamoya disease                    | 437.5                                                                                                                                       | I67.5                              |

ICD-9-CM: International Classification of Diseases, Ninth Revision, Clinical Modification;  
ICD-10-CM: International Classification of Diseases, Tenth Revision, Clinical Modification

**Table S2. ATC Codes of Medications.**

| <b>Categories</b>                                    | <b>ATC codes</b> | <b>Medication</b> |
|------------------------------------------------------|------------------|-------------------|
| <b>Oral anticoagulants</b>                           | B01AA03          | Warfarin          |
|                                                      | B01AE07          | Dabigatran        |
|                                                      | B01AF01          | Rivaroxaban       |
|                                                      | B01AF02          | Apixaban          |
|                                                      | B01AF03          | Edoxaban          |
| <b>Platelet aggregation inhibitors</b>               | B01AC06          | Aspirin           |
|                                                      | B01AC04          | Clopidogrel       |
|                                                      | B01AC22          | Prasugrel         |
|                                                      | B01AC24          | Ticagrelor        |
| <b>Calcium channel blockers</b>                      | C08D, C08C       |                   |
| <b>Agents acting on the renin-angiotensin system</b> | C09              |                   |
| <b>HMG-CoA reductase inhibitors</b>                  | C10AA            |                   |
| <b>Nonsteroid anti-inflammatory drugs</b>            | M01A             |                   |
| <b>Antiarrhythmics, class I and III</b>              | C01B             |                   |
| <b>Digitalis glycosides</b>                          | C01AA05          | Digoxin           |
| <b>Beta blocking agents</b>                          | C07A             |                   |
| <b>Proton pump inhibitors</b>                        | A02BC            |                   |

ATC: Anatomical Therapeutic Chemical Classification

**Table S3. Diagnosis Codes for Baseline Comorbidities and Outcomes**

| <b>Condition</b>                      | <b>ICD-9-CM</b>                                                                                                                                                                                                                            | <b>ICD-10-CM</b>                                                                                                                                                                                                                                                                                                                           |
|---------------------------------------|--------------------------------------------------------------------------------------------------------------------------------------------------------------------------------------------------------------------------------------------|--------------------------------------------------------------------------------------------------------------------------------------------------------------------------------------------------------------------------------------------------------------------------------------------------------------------------------------------|
| <b>Congestive heart failure</b>       | 398.91, 428, 402.01, 402.11, 402.91, 404.01, 404.03, 404.11, 404.13, 404.91, 404.93, 425.4, 425.5, 425.7, 425.8, 425.9                                                                                                                     | I11.0, I13.0, I13.2, I42.0, I42.5, I42.6, I42.7, I42.8, I42.9, I50                                                                                                                                                                                                                                                                         |
| <b>Hypertension</b>                   | 401, 402, 403, 404, 405                                                                                                                                                                                                                    | I10, I11, I12, I13, I15, I16                                                                                                                                                                                                                                                                                                               |
| <b>Diabetes mellitus</b>              | 250                                                                                                                                                                                                                                        | E08, E09, E10, E11, E13                                                                                                                                                                                                                                                                                                                    |
| <b>Coronary artery disease</b>        | 410, 411, 412, 413, 414                                                                                                                                                                                                                    | I20, I21, I22, I23, I24, I25                                                                                                                                                                                                                                                                                                               |
| <b>Myocardial infarction</b>          | 410,412                                                                                                                                                                                                                                    | I21, I22, I25.2                                                                                                                                                                                                                                                                                                                            |
| <b>Peripheral artery disease</b>      | 440, 443                                                                                                                                                                                                                                   | I70, I73, I77.7                                                                                                                                                                                                                                                                                                                            |
| <b>Peripheral arterial thrombosis</b> | 444                                                                                                                                                                                                                                        | I74                                                                                                                                                                                                                                                                                                                                        |
| <b>Ischemic stroke</b>                | 433.01, 433.11, 433.21, 433.31, 433.81, 433.91, 434.01, 434.11, 434.91, 436, 362.3                                                                                                                                                         | I63, I67.89, I64, G45.3, H34                                                                                                                                                                                                                                                                                                               |
| <b>Transient ischemic attack</b>      | 435.0, 435.1, 435.2, 435.3, 435.8, 435.9                                                                                                                                                                                                   | G45.0, G45.1, G45.2, G45.8, G45.9, G46.0, G46.1, G46.2, I67.841, I67.848                                                                                                                                                                                                                                                                   |
| <b>Venous thromboembolism</b>         | 451, 453                                                                                                                                                                                                                                   | I80, I82                                                                                                                                                                                                                                                                                                                                   |
| <b>Pulmonary embolism</b>             | 415.1, 416.2                                                                                                                                                                                                                               | I26, I27.82,                                                                                                                                                                                                                                                                                                                               |
| <b>Intracerebral bleeding</b>         | 431                                                                                                                                                                                                                                        | I61                                                                                                                                                                                                                                                                                                                                        |
| <b>Intracranial bleeding</b>          | 430, 431, 432                                                                                                                                                                                                                              | I60, I61, I62                                                                                                                                                                                                                                                                                                                              |
| <b>Other intracranial bleeding</b>    | 430, 432                                                                                                                                                                                                                                   | I60, I62                                                                                                                                                                                                                                                                                                                                   |
| <b>Gastrointestinal bleeding</b>      | 531.0, 531.2, 531.4, 531.6, 532.0, 532.2, 532.4, 532.6, 533.0, 533.2, 533.4, 533.6, 534.0, 534.2, 534.4, 534.6, 535.01, 535.11, 535.21, 535.31, 535.41, 535.51, 535.61, 535.71, 562.02, 562.03, 562.12, 562.13, 568.81, 569.3, 569.85, 578 | K25.0, K25.2, K25.4, K25.6, K26.0, K26.2, K26.4, K26.6, K27.0, K27.2, K27.4, K27.6, K28.0, K28.2, K28.4, K28.6, K29.01, K29.21, K29.31, K29.41, K29.51, K29.61, K29.71, K28.91, K29.91, K52.81, K57.01, K57.11, K57.13, K57.21, K57.31, K57.33, K57.41, K57.51, K57.53, K57.81, K57.91, K57.93, K66.1, K62.5, K55.21, K92.0, K92.1, K92.2, |
| <b>Other bleeding events</b>          | 287.8, 287.9, 423.0, 459.0, 599.7, 719.1, 784.7, 784.8, 786.3, 362.81                                                                                                                                                                      | D69.8, D69.9, I31.2, R58, R31, M25.0, R04, H35.6                                                                                                                                                                                                                                                                                           |
| <b>Liver disease</b>                  | 570, 571, 572, 573, V42.7                                                                                                                                                                                                                  | K70, K71, K72, K73, K74. K75, K76, K77, Z94.4                                                                                                                                                                                                                                                                                              |
| <b>Renal disease</b>                  | 403.01, 403.11, 403.91, 404.02, 404.03, 404.12,                                                                                                                                                                                            | I12.0, I13.11, I13.2, N18, N19, Z49.0, Z49.3, Z91.15, Z94.0, Z98.4,                                                                                                                                                                                                                                                                        |

---

404.13, 404.92, 404.93, 585, Z99.2  
586, V42.0, V45.1, V56

---

ICD-9-CM: International Classification of Diseases, Ninth Revision, Clinical Modification;  
ICD-10-CM: International Classification of Diseases, Tenth Revision, Clinical Modification

**Table S4. National Health Insurance Codes for Stroke Severity Index**

| <b>Condition</b>                                       | <b>NHI codes</b>                                                                               |
|--------------------------------------------------------|------------------------------------------------------------------------------------------------|
| <b>Airway suctioning</b>                               | 47041C, 47042C                                                                                 |
| <b>Bacterial sensitivity test</b>                      | 13009C, 13020C, 13010C, 13021B, 13011C, 13022B, 13020C, 13009B, 13010B, 13011B                 |
| <b>General ward stay</b>                               | 02006K, 02007A, 02008B, 03001K, 03002A, 03004B, 03005K, 03006A, 03008B, 03026K, 03027A, 03029B |
| <b>ICU stay</b>                                        | 02011K, 02012A, 02013B, 03010E, 03011F, 03012G, 03047E, 03048F, 03049G                         |
| <b>Nasogastric intubation</b>                          | 47017C, 47018C                                                                                 |
| <b>Osmotherapy<br/>(mannitol or glycerol infusion)</b> | <b>ATC codes:</b> B05BC01, B05BC92                                                             |
| <b>Urinary catheterization</b>                         | 47013C, 47014C                                                                                 |

NHI: National Health Insurance; ICU: Intensive Care Unit; ATC: Anatomical Therapeutic Chemical Classification

**Table S5. Distribution of Inverse Probability of Treatment Weights**

| <b>Weight</b> | <b>OAC<br/>Users</b> | <b>AT<br/>non-users</b> | <b>AP<br/>users</b> | <b>AT<br/>non-users</b> | <b>NOAC<br/>users</b> | <b>Warfarin<br/>users</b> |
|---------------|----------------------|-------------------------|---------------------|-------------------------|-----------------------|---------------------------|
| 100%          | 15.38                | 2.59                    | 26.14               | 1.97                    | 3.19                  | 9.93                      |
| 99%           | 13.07                | 2.17                    | 17.27               | 1.65                    | 2.50                  | 5.33                      |
| 95%           | 9.06                 | 1.68                    | 12.93               | 1.45                    | 2.13                  | 4.09                      |
| 90%           | 8.07                 | 1.53                    | 10.38               | 1.36                    | 1.96                  | 3.47                      |
| 75%           | 5.91                 | 1.34                    | 7.37                | 1.25                    | 1.77                  | 2.89                      |
| 50%           | 4.05                 | 1.19                    | 5.18                | 1.17                    | 1.57                  | 2.47                      |
| 25%           | 2.81                 | 1.12                    | 3.64                | 1.11                    | 1.43                  | 2.06                      |
| 10%           | 2.11                 | 1.08                    | 2.95                | 1.08                    | 1.30                  | 1.89                      |
| 5%            | 1.88                 | 1.07                    | 2.51                | 1.06                    | 1.18                  | 1.77                      |
| 1%            | 1.61                 | 1.05                    | 2.02                | 1.05                    | 1.10                  | 1.60                      |
| 0%            | 1.46                 | 1.04                    | 1.76                | 1.04                    | 1.06                  | 1.56                      |

OACs: Oral anticoagulants, AT: Antithrombotic therapy, AP: Antiplatelet, NOAC: Non-vitamin K antagonist oral anticoagulants

**Table S6. Baseline Characteristics Among Oral Anticoagulant Users and Antithrombotic Therapy Non-Users**

| Characteristics, N (%)                                  | Inverse probability of treatment weighting |                        |                                  |                        |                           |                                  |
|---------------------------------------------------------|--------------------------------------------|------------------------|----------------------------------|------------------------|---------------------------|----------------------------------|
|                                                         | Before                                     |                        |                                  | After                  |                           |                                  |
|                                                         | OAC users<br>N=283                         | AT non-users<br>N=1069 | Absolute Standardized difference | OAC users<br>N=1312.54 | AT non-users<br>N=1353.16 | Absolute Standardized Difference |
| Age, mean (SD)                                          | 75.61 (9.84)                               | 76.31 (10.69)          | 0.07                             | 76.50 (21.09)          | 76.20 (11.99)             | 0.03                             |
| Sex, male                                               | 166 (58.66)                                | 618 (57.81)            | 0.02                             | 776.73 (59.18)         | 786.62 (58.13)            | 0.02                             |
| CHA <sub>2</sub> DS <sub>2</sub> -VASc score, mean (SD) | 5.31 (1.67)                                | 5.20 (1.57)            | 0.07                             | 5.24 (3.64)            | 5.23 (1.76)               | 0.01                             |
| 0-4*                                                    | 89 (31.45)                                 | 349 (32.65)            |                                  | 449.58 (34.25)         | 432.00 (31.93)            |                                  |
| 5-6*                                                    | 116 (40.99)                                | 495 (46.3)             |                                  | 510.56 (38.90)         | 630.06 (46.56)            |                                  |
| ≥7*                                                     | 78 (27.56)                                 | 225 (21.05)            |                                  | 352.39 (26.85)         | 291.10 (21.51)            |                                  |
| Stroke severity index, mean (SD)                        | 12.57 (5.81)                               | 15.24 (5.83)           | 0.46                             | 14.17 (12.44)          | 14.66 (6.72)              | 0.08                             |
| <b>Comorbidities</b>                                    |                                            |                        |                                  |                        |                           |                                  |
| Congestive heart failure                                | 92 (32.51)                                 | 301 (28.16)            | 0.10                             | 396.66 (30.22)         | 395.29 (29.21)            | 0.02                             |
| Hypertension                                            | 209 (73.85)                                | 830 (77.64)            | 0.09                             | 1021.87 (77.85)        | 1042.63 (77.05)           | 0.02                             |
| Diabetes mellitus                                       | 88 (31.1)                                  | 376 (35.17)            | 0.09                             | 441.43 (33.63)         | 466.52 (34.48)            | 0.02                             |
| Coronary artery disease                                 | 63 (22.26)                                 | 228 (21.33)            | 0.02                             | 293.43 (22.36)         | 293.77 (21.71)            | 0.02                             |
| PAD and PAT                                             | 17 (6.01)                                  | 35 (3.27)              | 0.13                             | 50.58 (3.85)           | 52.44 (3.88)              | <0.01                            |
| IS and TIA                                              | 145 (51.24)                                | 470 (43.97)            | 0.15                             | 595.26 (45.35)         | 615.24 (45.47)            | <0.01                            |
| VT and PE                                               | 11 (3.89)                                  | 19 (1.78)              | 0.13                             | 31.39 (2.39)           | 30.22 (2.23)              | 0.01                             |
| Gastrointestinal bleeding                               | 22 (7.77)                                  | 58 (5.43)              | 0.10                             | 71.24 (5.43)           | 78.65 (5.81)              | 0.02                             |
| Other bleeding events                                   | 10 (3.53)                                  | 50 (4.68)              | 0.06                             | 50.62 (3.86)           | 60.39 (4.46)              | 0.03                             |
| Liver disease                                           | 15 (5.3)                                   | 50 (4.68)              | 0.03                             | 66.32 (5.05)           | 65.57 (4.85)              | 0.01                             |



|                                     |             |             |       |                |                 |       |
|-------------------------------------|-------------|-------------|-------|----------------|-----------------|-------|
| Renal disease                       | 28 (9.89)   | 95 (8.89)   | 0.04  | 125.83 (9.59)  | 124.09 (9.17)   | 0.014 |
| <b>Baseline medication history</b>  |             |             |       |                |                 |       |
| Antithrombotic agents <sup>†</sup>  | 283 (100)   | 1069 (100)  | <0.01 | 1312.54 (100)  | 1353.16 (100)   | <0.01 |
| Calcium channel blockers            | 144 (50.88) | 515 (48.18) | 0.05  | 709.72 (54.07) | 664.13 (49.08)  | 0.10  |
| ACEIs/ARBs                          | 162 (57.24) | 524 (49.02) | 0.17  | 690.09 (52.58) | 685.96 (50.69)  | 0.04  |
| HMG-CoA reductase inhibitors        | 81 (28.62)  | 149 (13.94) | 0.37  | 236.64 (18.03) | 230.31 (17.02)  | 0.03  |
| NSAIDs                              | 80 (28.27)  | 265 (24.79) | 0.08  | 365.56 (27.85) | 349.53 (25.83)  | 0.05  |
| Antiarrhythmics,<br>class I and III | 78 (27.56)  | 218 (20.39) | 0.17  | 309.41 (23.57) | 298.272 (22.04) | 0.04  |
| Rate control drugs <sup>‡</sup>     | 166 (58.66) | 524 (49.02) | 0.19  | 717.56 (54.67) | 693.52 (51.25)  | 0.07  |
| Proton pump inhibitors              | 29 (10.25)  | 84 (7.86)   | 0.08  | 95.97 (7.31)   | 111.85 (8.27)   | 0.03  |

OAC, oral anticoagulant; AT, antithrombotic therapy, SD, standard deviation, IPTW, inverse probability treatment weighting; PAD, peripheral artery disease; PAT, peripheral artery thrombosis; IS, ischemic stroke; TIA, transient ischemic attack; VT, venous thromboembolism; PE, pulmonary embolism, ACEI, angiotensin-converting enzyme inhibitor; ARB, angiotensin receptor blocker; NSAID, non-steroidal anti-inflammatory drug

\* Denotes descriptive variables that were not included in the propensity score

<sup>†</sup> Antithrombotic agents include oral anticoagulants and antiplatelet agents

<sup>‡</sup> Rate control drugs include ATC code C07A and C01AA05

**Table S7. Baseline Characteristics Among Antiplatelet Agent Users and Antithrombotic Therapy Non-Users**

| Characteristics, N (%)                                  | Inverse probability of treatment weighting |                        |                                  |                       |                           |                                  |
|---------------------------------------------------------|--------------------------------------------|------------------------|----------------------------------|-----------------------|---------------------------|----------------------------------|
|                                                         | Before                                     |                        |                                  | After                 |                           |                                  |
|                                                         | AP users<br>N=214                          | AT non-users<br>N=1069 | Absolute Standardized difference | AP users<br>N=1291.35 | AT non-users<br>N=1282.23 | Absolute Standardized Difference |
| Age, mean (SD)                                          | 75.12 (11.10)                              | 76.31 (10.69)          | 0.11                             | 76.42 (26.83)         | 76.13 (11.71)             | 0.03                             |
| Sex, male                                               | 140 (65.42)                                | 618 (57.81)            | 0.16                             | 794.45 (61.52)        | 757.92 (59.11)            | 0.05                             |
| CHA <sub>2</sub> DS <sub>2</sub> -VASc score, mean (SD) | 5.31 (1.56)                                | 5.20 (1.57)            | 0.07                             | 5.26 (3.90)           | 5.22 (1.72)               | 0.03                             |
| 0-4*                                                    | 67 (31.31)                                 | 349 (32.65)            |                                  | 440.68 (34.13)        | 412.05 (32.14)            |                                  |
| 5-6*                                                    | 96 (44.86)                                 | 495 (46.3)             |                                  | 541.84 (41.96)        | 593.45 (46.28)            |                                  |
| ≥7*                                                     | 51 (23.83)                                 | 225 (21.05)            |                                  | 308.82 (23.91)        | 276.73 (21.58)            |                                  |
| Stroke severity index, mean (SD)                        | 13.24 (5.73)                               | 15.24 (5.83)           | 0.35                             | 14.98 (14.19)         | 14.91 (6.47)              | 0.01                             |
| <b>Comorbidities</b>                                    |                                            |                        |                                  |                       |                           |                                  |
| Congestive heart failure                                | 69 (32.24)                                 | 301 (28.16)            | 0.09                             | 386.29 (29.91)        | 370.80 (28.92)            | 0.02                             |
| Hypertension                                            | 167 (78.04)                                | 830 (77.64)            | 0.01                             | 1013.31 (78.47)       | 997.87 (77.82)            | 0.02                             |
| Diabetes mellitus                                       | 84 (39.25)                                 | 376 (35.17)            | 0.08                             | 439.73 (34.05)        | 459.54 (35.84)            | 0.04                             |
| Coronary artery disease                                 | 67 (31.31)                                 | 228 (21.33)            | 0.23                             | 279.86 (21.67)        | 292.79 (22.83)            | 0.03                             |
| PAD and PAT                                             | 9 (4.21)                                   | 35 (3.27)              | 0.05                             | 43.81 (3.39)          | 43.34 (3.38)              | <0.01                            |
| IS and TIA                                              | 109 (50.93)                                | 470 (43.97)            | 0.14                             | 624.66 (48.37)        | 580.82 (45.30)            | 0.06                             |
| VT and PE                                               | 3 (1.4)                                    | 19 (1.78)              | 0.03                             | 21.37 (1.65)          | 21.91 (1.71)              | <0.01                            |
| Gastrointestinal bleeding                               | 18 (8.41)                                  | 58 (5.43)              | 0.12                             | 64.70 (5.01)          | 74.67 (5.82)              | 0.03                             |
| Other bleeding events                                   | 16 (7.48)                                  | 50 (4.68)              | 0.12                             | 63.93 (4.95)          | 65.53 (5.11)              | 0.01                             |
| Liver disease                                           | 12 (5.61)                                  | 50 (4.68)              | 0.04                             | 48.24 (3.74)          | 60.67 (4.73)              | 0.05                             |

|                                     |             |             |       |                |                |       |
|-------------------------------------|-------------|-------------|-------|----------------|----------------|-------|
| Renal disease                       | 20 (9.35)   | 95 (8.89)   | 0.02  | 99.30 (7.69)   | 114.79 (8.95)  | 0.04  |
| <b>Baseline medication history</b>  |             |             |       |                |                |       |
| Antithrombotic agents <sup>†</sup>  | 214 (100)   | 1069 (100)  | <0.01 | 1291.35 (100)  | 1282.23 (100)  | <0.01 |
| Calcium channel blockers            | 99 (46.26)  | 515 (48.18) | 0.04  | 619.89 (48.00) | 615.49 (48.00) | <0.01 |
| ACEIs/ARBs                          | 125 (58.41) | 524 (49.02) | 0.19  | 639.19 (49.50) | 647.87 (50.53) | 0.02  |
| HMG-CoA reductase inhibitors        | 42 (19.63)  | 149 (13.94) | 0.15  | 192.35 (14.89) | 191.12 (14.9)  | <0.01 |
| NSAIDs                              | 63 (29.44)  | 265 (24.79) | 0.11  | 326.24 (25.26) | 327.52 (25.54) | 0.01  |
| Antiarrhythmics,<br>class I and III | 53 (24.77)  | 218 (20.39) | 0.11  | 278.06 (21.53) | 270.96 (21.13) | 0.01  |
| Rate control drugs <sup>‡</sup>     | 131 (61.21) | 524 (49.02) | 0.25  | 653.26 (50.59) | 655.07 (51.09) | 0.01  |
| Proton pump inhibitors              | 11 (5.14)   | 84 (7.86)   | 0.11  | 100.37 (7.77)  | 94.78 (7.39)   | 0.02  |

AP, antiplatelet; AT, antithrombotic therapy, SD, standard deviation, IPTW, inverse probability treatment weighting; PAD, peripheral artery disease; PAT, peripheral artery thrombosis; IS, ischemic stroke; TIA, transient ischemic attack; VT, venous thromboembolism; PE, pulmonary embolism, ACEI, angiotensin-converting enzyme inhibitor; ARB, angiotensin receptor blocker; NSAIDs, non-steroidal anti-inflammatory drug

\* Denotes descriptive variables that were not included in the propensity score

<sup>†</sup> Antithrombotic agents include oral anticoagulants and antiplatelet agents

<sup>‡</sup> Rate control drugs include ATC code C07A and C01AA05

**Table S8. Baseline Characteristics Among Oral Anticoagulant Users and Antiplatelet Agent Users**

| Characteristics, N (%)                                  | Inverse probability of treatment weighting |                   |                                  |                       |                      |                                  |
|---------------------------------------------------------|--------------------------------------------|-------------------|----------------------------------|-----------------------|----------------------|----------------------------------|
|                                                         | Before                                     |                   |                                  | After                 |                      |                                  |
|                                                         | OAC users<br>N=283                         | AP users<br>N=214 | Absolute Standardized difference | OAC users<br>N=495.25 | AP users<br>N=498.38 | Absolute Standardized Difference |
| Age, mean (SD)                                          | 75.61 (9.84)                               | 75.12 (11.10)     | 0.05                             | 75.45 (13.01)         | 75.34 (17.44)        | 0.01                             |
| Sex, male                                               | 166 (58.66)                                | 140 (65.42)       | 0.14                             | 309.25 (62.01)        | 304.69 (61.52)       | 0.01                             |
| CHA <sub>2</sub> DS <sub>2</sub> -VASc score, mean (SD) | 5.31 (1.67)                                | 5.31 (1.56)       | <0.01                            | 5.31 (2.19)           | 5.29 (2.43)          | 0.01                             |
| 0-4*                                                    | 89 (31.45)                                 | 67 (31.31)        | 0.10                             | 156.88 (31.68)        | 162.78 (32.66)       | 0.09                             |
| 5-6*                                                    | 116 (40.99)                                | 96 (44.86)        |                                  | 202.73 (40.94)        | 220.14 (44.17)       |                                  |
| ≥7*                                                     | 78 (27.56)                                 | 51 (23.83)        |                                  | 135.63 (27.39)        | 115.46 (23.17)       |                                  |
| Stroke severity index, mean (SD)                        | 12.57 (5.81)                               | 13.24 (5.74)      | 0.12                             | 12.81 (7.56)          | 12.86 (8.76)         | 0.01                             |
| <b>Comorbidities</b>                                    |                                            |                   |                                  |                       |                      |                                  |
| Congestive heart failure                                | 92 (32.51)                                 | 69 (32.24)        | 0.01                             | 158.01 (31.91)        | 157.56 (31.61)       | 0.01                             |
| Hypertension                                            | 209 (73.85)                                | 167 (78.04)       | 0.10                             | 374.79 (75.68)        | 376.92 (75.63)       | <0.01                            |
| Diabetes mellitus                                       | 88 (31.10)                                 | 84 (39.25)        | 0.17                             | 170.20 (34.37)        | 171.79 (34.47)       | <0.01                            |
| Coronary artery disease                                 | 63 (22.26)                                 | 67 (31.31)        | 0.21                             | 130.23 (26.30)        | 134.29 (26.94)       | 0.02                             |
| PAD and PAT                                             | 17 (6.01)                                  | 9 (4.21)          | 0.08                             | 24.27 (4.90)          | 22.64 (4.54)         | 0.02                             |
| IS and TIA                                              | 145 (51.24)                                | 109 (50.93)       | 0.01                             | 254.48 (51.38)        | 257.14 (51.60)       | <0.01                            |
| VT and PE                                               | 11 (3.89)                                  | 3 (1.40)          | 0.16                             | 13.43 (2.71)          | 9.27 (1.86)          | 0.06                             |
| Gastrointestinal bleeding                               | 22 (7.77)                                  | 18 (8.41)         | 0.02                             | 41.16 (8.31)          | 39.14 (7.85)         | 0.02                             |
| Other bleeding events                                   | 10 (3.53)                                  | 16 (7.48)         | 0.17                             | 22.68 (4.58)          | 25.65 (5.15)         | 0.03                             |
| Liver disease                                           | 15 (5.30)                                  | 12 (5.61)         | 0.01                             | 27.50 (5.55)          | 28.06 (5.63)         | <0.01                            |

|                                     |             |             |      |                |                |       |
|-------------------------------------|-------------|-------------|------|----------------|----------------|-------|
| Renal disease                       | 28 (9.89)   | 20 (9.35)   | 0.02 | 47.93 (9.68)   | 52.57 (10.55)  | 0.03  |
| <b>Baseline medication history</b>  |             |             |      |                |                |       |
| Antithrombotic agents <sup>†</sup>  | 283         | 214         |      | 495.25         | 498.38         |       |
| Calcium channel blockers            | 144 (50.88) | 99 (42.26)  | 0.09 | 246.38 (49.75) | 255.89 (51.34) | 0.03  |
| ACEIs/ARBs                          | 162 (57.24) | 125 (58.41) | 0.02 | 284.08 (57.36) | 279.70 (56.12) | 0.03  |
| HMG-CoA reductase inhibitors        | 81 (28.62)  | 42 (19.63)  | 0.21 | 123.24 (24.88) | 130.63 (26.21) | 0.03  |
| NSAIDs                              | 80 (28.27)  | 63 (29.44)  | 0.03 | 140.12 (28.29) | 140.46 (28.18) | <0.01 |
| Antiarrhythmics,<br>class I and III | 78 (27.56)  | 53 (24.77)  | 0.06 | 131.66 (26.58) | 133.33 (26.75) | <0.01 |
| Rate control drugs <sup>‡</sup>     | 166 (58.66) | 131 (61.21) | 0.05 | 300.52 (60.68) | 305.89 (61.38) | 0.01  |
| Proton pump inhibitors              | 29 (10.25)  | 11 (5.14)   | 0.19 | 40.65 (8.21)   | 42.73 (8.57)   | 0.01  |

AP, antiplatelet agent; OAC, oral anticoagulant; SD, standard deviation, IPTW, inverse probability treatment weighting; PAD, peripheral artery disease; PAT, peripheral artery thrombosis; IS, ischemic stroke; TIA, transient ischemic attack; VT, venous thromboembolism; PE, pulmonary embolism, ACEI, angiotensin-converting enzyme inhibitor; ARB, angiotensin receptor blocker; NSAID, non-steroidal anti-inflammatory drug

\* Denotes descriptive variables that were not included in the propensity score.

<sup>†</sup> Antithrombotic agents include oral anticoagulants and antiplatelet agents.

<sup>‡</sup>Rate control drugs include ATC code C07A and C01AA05.

**Table S9. Baseline Characteristics Among NOAC Users and Warfarin Users**

| Characteristics, N (%)                                  | Inverse probability of treatment weighting |                         |                                  |                        |                            |                                  |
|---------------------------------------------------------|--------------------------------------------|-------------------------|----------------------------------|------------------------|----------------------------|----------------------------------|
|                                                         | Before                                     |                         |                                  | After                  |                            |                                  |
|                                                         | NOAC users<br>N=333                        | Warfarin users<br>N=205 | Absolute Standardized difference | NOAC users<br>N=538.00 | Warfarin users<br>N=537.19 | Absolute Standardized Difference |
| Age, mean (SD)                                          | 76.23 (9.99)                               | 74.34 (10.24)           | 0.19                             | 75.53 (13.01)          | 75.45 (15.61)              | 0.01                             |
| Sex, male                                               | 191 (57.36)                                | 117 (57.07)             | 0.01                             | 311.82 (57.96)         | 309.64 (57.64)             | 0.01                             |
| CHA <sub>2</sub> DS <sub>2</sub> -VASc score, mean (SD) | 5.16 (1.54)                                | 4.92 (1.77)             | 0.15                             | 5.07 (1.97)            | 5.06 (2.84)                | 0.01                             |
| 0-4*                                                    | 108 (32.43)                                | 84 (40.98)              |                                  | 185.55 (34.49)         | 204.69 (38.10)             |                                  |
| 5-6*                                                    | 164 (49.25)                                | 79 (38.54)              |                                  | 263.23 (48.93)         | 210.58 (39.20)             |                                  |
| ≥7*                                                     | 61 (18.32)                                 | 42 (20.49)              |                                  | 89.22 (16.58)          | 121.91 (22.69)             |                                  |
| Stroke severity index, mean (SD)                        | 13.16 (6.05)                               | 13.21 (5.74)            | 0.01                             | 13.18 (7.64)           | 13.16 (9.40)               | 0.01                             |
| <b>Comorbidities</b>                                    |                                            |                         |                                  |                        |                            |                                  |
| Congestive heart failure                                | 89 (26.73)                                 | 53 (25.85)              | 0.02                             | 141.69 (26.34)         | 139.74 (26.01)             | 0.04                             |
| Hypertension                                            | 240 (72.07)                                | 143 (69.76)             | 0.05                             | 385.29 (71.62)         | 390.75 (72.74)             | 0.03                             |
| Diabetes mellitus                                       | 93 (27.93)                                 | 66 (32.2)               | 0.09                             | 160.81 (29.89)         | 160.11 (29.80)             | <0.01                            |
| Coronary artery disease                                 | 59 (17.72)                                 | 40 (19.51)              | 0.05                             | 101.49 (18.86)         | 110.24 (20.52)             | 0.04                             |
| PAD and PAT                                             | 19 (5.71)                                  | 3 (1.46)                | 0.23                             | 21.93 (4.08)           | 19.98 (3.72)               | 0.02                             |
| IS and TIA                                              | 152 (45.65)                                | 82 (40)                 | 0.11                             | 232.45 (43.21)         | 230.58 (42.92)             | 0.01                             |
| VT and PE                                               | 10 (3)                                     | 8 (3.9)                 | 0.05                             | 17.75 (3.30)           | 17.71 (3.30)               | <0.01                            |
| Gastrointestinal bleeding                               | 17 (5.11)                                  | 12 (5.85)               | 0.03                             | 29.86 (5.55)           | 30.20 (5.62)               | <0.01                            |
| Other bleeding events                                   | 11 (3.3)                                   | 8 (3.9)                 | 0.03                             | 18.816 (3.50)          | 18.03 (3.36)               | 0.01                             |
| Liver disease                                           | 11 (3.3)                                   | 11 (5.37)               | 0.10                             | 21.27 (3.95)           | 20.67 (3.85)               | 0.01                             |

|                                     |             |             |      |                |                |       |
|-------------------------------------|-------------|-------------|------|----------------|----------------|-------|
| Renal disease                       | 28 (8.41)   | 22 (10.73)  | 0.08 | 51.96 (9.66)   | 52.26 (9.73)   | <0.01 |
| <b>Baseline medication history</b>  |             |             |      |                |                |       |
| Oral anticoagulants                 | 286 (85.89) | 175 (85.37) | 0.02 | 459.76 (85.46) | 457.98 (85.25) | 0.01  |
| Antiplatelet agents                 | 71 (21.32)  | 46 (22.44)  | 0.03 | 118.22 (21.97) | 117.00 (21.78) | 0.01  |
| Calcium channel blockers            | 142 (42.64) | 84 (40.98)  | 0.03 | 225.41 (41.90) | 229.18 (42.66) | 0.02  |
| ACEI/ARB                            | 164 (49.25) | 94 (45.85)  | 0.07 | 257.36 (47.84) | 261.78 (48.73) | 0.02  |
| HMG-CoA reductase inhibitors        | 80 (24.02)  | 37 (18.05)  | 0.15 | 117.61 (21.86) | 119.14 (22.18) | 0.01  |
| NSAIDs                              | 108 (32.43) | 72 (35.12)  | 0.06 | 179.43 (33.35) | 175.86 (32.74) | 0.01  |
| Antiarrhythmics,<br>class I and III | 72 (21.62)  | 50 (24.39)  | 0.07 | 119.79 (22.27) | 115.92 (21.58) | 0.02  |
| Rate control drugs <sup>†</sup>     | 173 (51.95) | 107 (52.2)  | 0.01 | 281.61 (52.34) | 280.00 (52.12) | <0.01 |
| Proton pump inhibitors              | 49 (14.71)  | 21 (10.24)  | 0.14 | 70.74 (13.15)  | 67.53 (12.57)  | 0.02  |

NOAC, non-vitamin K antagonist oral anticoagulant; SD, standard deviation, IPTW, inverse probability treatment weighting; PAD, peripheral artery disease; PAT, peripheral artery thrombosis; IS, ischemic stroke; TIA, transient ischemic attack; VT, venous thromboembolism; PE, pulmonary embolism, ACEI, angiotensin-converting enzyme inhibitor; ARB, angiotensin receptor blocker; NSAID, non-steroidal anti-inflammatory drug

\* Denotes descriptive variables that were not included in the propensity score

† Rate control drugs include ATC code C07A and C01AA05

**Table S10. Sensitivity Analysis: Event Rate of Different Outcomes According to Treatment Stratification (Up to 2 Years of Follow-Up)**

| Outcome                  | No treatment           | Oral anticoagulants    | Adjusted HR <sup>a</sup> | Antiplatelet therapy   | Adjusted HR <sup>b</sup> |
|--------------------------|------------------------|------------------------|--------------------------|------------------------|--------------------------|
| Ischemic stroke          |                        |                        | 0.61 (0.42-0.88)         |                        | 1.13 (0.82-1.56)         |
| Number of events         | 52                     | 10                     |                          | 15                     |                          |
| Person-years             | 840.05                 | 267.77                 |                          | 217.13                 |                          |
| Event rate (95% CI)      | 61.90 (47.17-81.23)    | 37.35 (20.09-69.41)    |                          | 69.08 (41.65-114.59)   |                          |
| Thromboembolism          |                        |                        | 0.60 (0.43-0.83)         |                        | 1.11 (0.84-1.48)         |
| Number of events         | 68                     | 12                     |                          | 18                     |                          |
| Person-years             | 838.42                 | 265.45                 |                          | 212.26                 |                          |
| Event rate (95% CI)      | 81.10 (63.95-102.87)   | 45.13 (25.63-79.47)    |                          | 84.80 (53.43-134.60)   |                          |
| Intracerebral hemorrhage |                        |                        | 1.10 (0.63-1.93)         |                        | 1.80 (1.07-3.03)         |
| Number of events         | 17                     | 4                      |                          | 7                      |                          |
| Person-years             | 837.76                 | 272.82                 |                          | 218.08                 |                          |
| Event rate (95% CI)      | 20.29 (12.61-32.64)    | 14.66 (5.50-39.06)     |                          | 32.10 (15.30-67.33)    |                          |
| Major bleeding           |                        |                        | 1.34 (0.94-1.89)         |                        | 1.11 (0.78-1.59)         |
| Number of events         | 42                     | 11                     |                          | 11                     |                          |
| Person-years             | 827.82                 | 269.18                 |                          | 217.28                 |                          |
| Event rate (95%CI)       | 50.74 (37.49-68.65)    | 40.86 (22.63-73.79)    |                          | 50.63 (28.04-91.42)    |                          |
| All-cause mortality      |                        |                        | 0.84 (0.71-0.99)         |                        | 0.90 (0.76-1.06)         |
| Number of events         | 235                    | 48                     |                          | 45                     |                          |
| Person-years             | 850.42                 | 273.71                 |                          | 221.67                 |                          |
| Event rate (95%CI)       | 276.34 (243.17-314.02) | 175.37 (132.16-232.71) |                          | 203.01 (151.57-271.89) |                          |

Abbreviations: CI, confidence interval; HR, hazard ratio.

<sup>a</sup>HR between oral anticoagulants and no treatment.

<sup>b</sup>HR between antiplatelet therapy and no treatment.



**Table S11. Sensitivity Analysis: Event Rate of Different Outcomes Between Warfarin and NOAC Therapy (Up to 2 Years of Follow-Up)**

| Outcome                  | Warfarin               | NOACs                 | Adjusted HR      |
|--------------------------|------------------------|-----------------------|------------------|
| Ischemic stroke          |                        |                       | 0.89 (0.48-1.63) |
| Number of events         | 9                      | 12                    |                  |
| Person-years             | 166.09                 | 251.90                |                  |
| Event rate (95% CI)      | 54.19 (28.20-104.15)   | 47.64 (27.05-83.88)   |                  |
| Thromboembolism          |                        |                       | 0.79 (0.45-1.39) |
| Number of events         | 11                     | 13                    |                  |
| Person-years             | 165.45                 | 250.84                |                  |
| Event rate (95% CI)      | 66.48 (36.82-120.05)   | 51.83 (30.09-89.26)   |                  |
| Intracerebral hemorrhage |                        |                       | 0.53 (0.22-1.30) |
| Number of events         | 6                      | 5                     |                  |
| Person-years             | 165.66                 | 258.45                |                  |
| Event rate (95% CI)      | 36.22 (16.27-80.62)    | 19.35 (8.05-46.48)    |                  |
| Major bleeding           |                        |                       | 0.36 (0.22-0.60) |
| Number of events         | 18                     | 13                    |                  |
| Person-years             | 160.04                 | 256.01                |                  |
| Event rate (95% CI)      | 112.47 (70.86-178.52)  | 50.78 (29.48-87.45)   |                  |
| All-cause mortality      |                        |                       | 0.58 (0.42-0.81) |
| Number of events         | 39                     | 34                    |                  |
| Person-years             | 167.41                 | 259.22                |                  |
| Event rate (95% CI)      | 232.96 (170.21-318.85) | 131.16 (93.72-183.57) |                  |

Abbreviations: CI, confidence interval; HR, hazard ratio; NOACs, non-vitamin K antagonist oral anticoagulants.

**Table S12. Sensitivity Analysis: Event Rate of Different Outcomes According to Treatment Stratification (At Least 3-Month Follow-Up)**

| Outcome                  | No treatment           | Oral anticoagulants   | Adjusted HR <sup>a</sup> | Antiplatelet therapy  | Adjusted HR <sup>b</sup> |
|--------------------------|------------------------|-----------------------|--------------------------|-----------------------|--------------------------|
| Ischemic stroke          |                        |                       | 0.63 (0.41-0.98)         |                       | 1.32 (0.91-1.92)         |
| Number of events         | 37                     | 7                     |                          | 12                    |                          |
| Person-years             | 1031.76                | 322.32                |                          | 268.49                |                          |
| Event rate (95% CI)      | 35.86 (25.98-49.49)    | 21.72 (10.35-45.55)   |                          | 44.69 (25.38-78.70)   |                          |
| Thromboembolism          |                        |                       | 0.57 (0.38-0.84)         |                       | 1.17 (0.84-1.63)         |
| Number of events         | 49                     | 8                     |                          | 13                    |                          |
| Person-years             | 1028.64                | 320.22                |                          | 260.08                |                          |
| Event rate (95% CI)      | 47.64 (36.00-63.03)    | 24.98 (12.49-49.96)   |                          | 49.98 (29.02-86.08)   |                          |
| Intracerebral hemorrhage |                        |                       | 1.79 (0.87-3.67)         |                       | 2.61 (1.32-5.16)         |
| Number of events         | 9                      | 3                     |                          | 5                     |                          |
| Person-years             | 1029.30                | 330.64                |                          | 271.56                |                          |
| Event rate (95% CI)      | 8.74 (4.55-16.80)      | 9.07 (2.93-28.13)     |                          | 18.41 (7.66-44.24)    |                          |
| Major bleeding           |                        |                       | 1.56 (1.00-2.44)         |                       | 1.56 (1.01-2.41)         |
| Number of events         | 25                     | 7                     |                          | 9                     |                          |
| Person-years             | 1013.65                | 323.43                |                          | 269.18                |                          |
| Event rate (95%CI)       | 24.66 (16.67-36.50)    | 21.64 (10.32-45.40)   |                          | 33.44 (17.40-64.26)   |                          |
| All-cause mortality      |                        |                       | 0.83 (0.69-1.00)         |                       | 0.84 (0.70-1.01)         |
| Number of events         | 190                    | 39                    |                          | 35                    |                          |
| Person-years             | 1051.41                | 331.69                |                          | 276.48                |                          |
| Event rate (95%CI)       | 180.71 (156.76-208.32) | 117.58 (85.91-160.92) |                          | 126.59 (90.89-176.32) |                          |

Abbreviations: CI, confidence interval; HR, hazard ratio.

<sup>a</sup>HR between oral anticoagulants and no treatment.

<sup>b</sup>HR between antiplatelet therapy and no treatment.

**Table S13. Sensitivity Analysis: Event Rate of Different Outcomes Between Warfarin and NOAC Therapy (At Least 3-Month Follow-Up)**

| Outcome                  | NOACs                 | Warfarin               | Adjusted HR      |
|--------------------------|-----------------------|------------------------|------------------|
| Ischemic stroke          |                       |                        | 0.67 (0.33-1.36) |
| Number of events         | 8                     | 8                      |                  |
| Person-years             | 270.80                | 191.90                 |                  |
| Event rate (95% CI)      | 29.54 (14.77-59.07)   | 41.69 (20.85-83.36)    |                  |
| Thromboembolism          |                       |                        | 0.59 (0.30-1.18) |
| Number of events         | 8                     | 9                      |                  |
| Person-years             | 269.52                | 191.06                 |                  |
| Event rate (95% CI)      | 29.68 (14.84)         | (24.51-90.54)          |                  |
| Intracerebral hemorrhage |                       |                        | 0.73 (0.23-2.33) |
| Number of events         | 3                     | 3                      |                  |
| Person-years             | 278.71                | 191.78                 |                  |
| Event rate (95% CI)      | (3.47-33.37)          | 15.64 (5.05-48.50)     |                  |
| Major bleeding           |                       |                        | 0.44 (0.22-0.87) |
| Number of events         | 7                     | 8                      |                  |
| Person-years             | 276.23                | 182.80                 |                  |
| Event rate (95% CI)      | 25.34 (12.08-53.16)   | 43.76 (21.89-87.51)    |                  |
| All-cause mortality      |                       |                        | 0.65 (0.45-0.94) |
| Number of events         | 28                    | 32                     |                  |
| Person-years             | 279.72                | 193.58                 |                  |
| Event rate (95% CI)      | 100.10 (69.12-144.98) | 165.30 (116.90-233.75) |                  |

Abbreviations: CI, confidence interval; HR, hazard ratio; NOACs, non-vitamin K antagonist oral anticoagulants.

**Table S14. Sensitivity Analysis: Event Rate of Different Outcomes Between Warfarin and NOAC Therapy (With a 90-Day Landmark Period)**

| Outcome                  | NOACs<br>(N=325)       | Warfarin<br>(N=176)   | Adjusted HR      |
|--------------------------|------------------------|-----------------------|------------------|
| Ischemic stroke          |                        |                       | 0.64 (0.32-1.27) |
| Number of events         | 6                      | 8                     |                  |
| Person-years             | 187.02                 | 294.90                |                  |
| Event rate (95% CI)      | 32.08 (14.41-71.41)    | 27.13 (13.57-54.24)   |                  |
| Thromboembolism          |                        |                       | 0.74 (0.39-1.39) |
| Number of events         | 7                      | 10                    |                  |
| Person-years             | 186.56                 | 292.13                |                  |
| Event rate (95% CI)      | 37.52 (17.89-78.70)    | 34.23 (18.42-63.62)   |                  |
| Intracerebral hemorrhage |                        |                       | 0.25 (0.11-0.58) |
| Number of events         | 6                      | 4                     |                  |
| Person-years             | 188.47                 | 302.33                |                  |
| Event rate (95% CI)      | 31.83 (14.30-70.86)    | 13.23 (4.97-32.25)    |                  |
| Major bleeding           |                        |                       | 0.39 (0.24-0.64) |
| Number of events         | 14                     | 14                    |                  |
| Person-years             | 174.34                 | 298.62                |                  |
| Event rate (95% CI)      | 80.30 (47.56-135.59)   | 46.88 (27.77-79.16)   |                  |
| All-cause mortality      |                        |                       | 0.59 (0.42-0.84) |
| Number of events         | 34                     | 33                    |                  |
| Person-years             | 189.23                 | 302.95                |                  |
| Event rate (95% CI)      | 179.67 (128.38-251.46) | 108.93 (77.44-153.22) |                  |

Abbreviations: CI, confidence interval; HR, hazard ratio; NOACs, non-vitamin K antagonist oral anticoagulants.

**Table S15. Sensitivity Analysis: Event Rate of Different Outcomes Between Warfarin and NOAC Therapy (With a 90-Day Landmark Period and Up to 2 Years of Follow-Up)**

| Outcome                  | NOACs<br>(N= 325)      | Warfarin<br>(N= 176)  | Adjusted HR      |
|--------------------------|------------------------|-----------------------|------------------|
| Ischemic stroke          |                        |                       | 0.63 (0.32-1.26) |
| Number of events         | 6                      | 8                     |                  |
| Person-years             | 180.31                 | 291.89                |                  |
| Event rate (95% CI)      | 33.28 (14.95-74.07)    | 27.41 (13.71-54.80)   |                  |
| Thromboembolism          |                        |                       | 0.73 (0.39-1.37) |
| Number of events         | 7                      | 10                    |                  |
| Person-years             | 179.85                 | 289.11                |                  |
| Event rate (95% CI)      | 38.92 (18.56-81.64)    | 34.59 (18.61-64.28)   |                  |
| Intracerebral hemorrhage |                        |                       | 0.25 (0.11-0.58) |
| Number of events         | 6                      | 4                     |                  |
| Person-years             | 181.76                 | 299.32                |                  |
| Event rate (95% CI)      | 33.01 (14.83-73.48)    | 13.36 (5.02-35.61)    |                  |
| Major bleeding           |                        |                       | 0.39 (0.24-0.64) |
| Number of events         | 14                     | 14                    |                  |
| Person-years             | 168.09                 | 295.61                |                  |
| Event rate (95% CI)      | 83.29 (49.33-140.63)   | 47.36 (28.05-79.97)   |                  |
| All-cause mortality      |                        |                       | 0.57 (0.41-0.81) |
| Number of events         | 34                     | 33                    |                  |
| Person-years             | 182.52                 | 299.93                |                  |
| Event rate (95% CI)      | 186.28 (133.10-260.71) | 110.02 (78.22-154.76) |                  |

Abbreviations: CI, confidence interval; HR, hazard ratio; NOACs, non-vitamin K antagonist oral anticoagulants.

**Table S16. Event Rate of Different Outcomes According to Treatment Stratification  
(Trim Upper and Lower 2.5% of the Weights)**

| Outcome                  | No treatment<br>(n=1035) | Oral anticoagulants<br>(n=250) | Adjusted HR <sup>a</sup> | Antiplatelet therapy<br>(n=181) | Adjusted HR <sup>b</sup> |
|--------------------------|--------------------------|--------------------------------|--------------------------|---------------------------------|--------------------------|
| Ischemic stroke          |                          |                                | 0.51 (0.33-0.79)         |                                 | 1.44 (1.03-2.02)         |
| Number of events         | 50                       | 8                              |                          | 14                              |                          |
| Person-years             | 1040.82                  | 287.50                         |                          | 220.88                          |                          |
| Event rate (95% CI)      | 48.04 (36.41-63.38)      | 27.83 (13.92-55.64)            |                          | 63.38 (37.54-107.02)            |                          |
| Thromboembolism          |                          |                                | 0.57 (0.40-0.83)         |                                 | 1.37 (1.01-1.86)         |
| Number of events         | 65                       | 10                             |                          | 16                              |                          |
| Person-years             | 1037.92                  | 285.60                         |                          | 214.09                          |                          |
| Event rate (95% CI)      | 62.63 (49.11-79.86)      | 35.01 (18.84-65.07)            |                          | 74.74 (45.79-121.99)            |                          |
| Intracerebral hemorrhage |                          |                                | 0.94 (0.51-1.75)         |                                 | 1.88 (1.09-3.24)         |
| Number of events         | 17                       | 3                              |                          | 6                               |                          |
| Person-years             | 1038.30                  | 295.24                         |                          | 224.00                          |                          |
| Event rate (95% CI)      | 16.37 (10.18-26.34)      | 10.16 (3.28-31.51)             |                          | 26.79 (12.03-59.62)             |                          |
| Major bleeding           |                          |                                | 1.01 (0.68-1.51)         |                                 | 1.34 (0.92-1.95)         |
| Number of events         | 40                       | 7                              |                          | 10                              |                          |
| Person-years             | 1023.99                  | 289.28                         |                          | 221.62                          |                          |
| Event rate (95%CI)       | 39.06 (28.65-53.25)      | 24.20 (11.54-50.76)            |                          | 45.12 (24.28-83.86)             |                          |
| All-cause mortality      |                          |                                | 0.62 (0.51-0.76)         |                                 | 0.83 (0.69-1.001)        |
| Number of events         | 218                      | 34                             |                          | 36                              |                          |
| Person-years             | 1059.43                  | 296.13                         |                          | 228.59                          |                          |
| Event rate (95%CI)       | 205.77 (180.19-234.98)   | 114.82 (82.04-160.69)          |                          | 157.49 (113.60-218.33)          |                          |

Abbreviations: CI, confidence interval; HR, hazard ratio.

<sup>a</sup>HR between oral anticoagulants and no treatment.

<sup>b</sup>HR between antiplatelet therapy and no treatment.

**Table S17. Event Rate of Different Outcomes Between Warfarin and NOAC Therapy  
(Trim Upper and Lower 2.5% of the Weights)**

| Outcome                  | NOACs<br>(n=319)      | Warfarin<br>(n=191)    | Adjusted HR      |
|--------------------------|-----------------------|------------------------|------------------|
| Ischemic stroke          |                       |                        | 0.94 (0.49-1.79) |
| Number of events         | 11                    | 8                      |                  |
| Person-years             | 261.35                | 186.33                 |                  |
| Event rate (95% CI)      | 42.09 (23.31-76.00)   | 42.93 (21.47-85.85)    |                  |
| Thromboembolism          |                       |                        | 0.80 (0.44-1.46) |
| Number of events         | 12                    | 10                     |                  |
| Person-years             | 260.29                | 185.70                 |                  |
| Event rate (95% CI)      | 46.10 (26.18-81.18)   | 53.85 (28.98-100.09)   |                  |
| Intracerebral hemorrhage |                       |                        | 0.41 (0.16-1.05) |
| Number of events         | 4                     | 6                      |                  |
| Person-years             | 269.36                | 185.92                 |                  |
| Event rate (95% CI)      | 14.85 (5.57-39.57)    | 32.27 (14.50-71.83)    |                  |
| Major bleeding           |                       |                        | 0.45 (0.26-0.77) |
| Number of events         | 12                    | 16                     |                  |
| Person-years             | 266.89                | 177.52                 |                  |
| Event rate (95% CI)      | 44.96 (25.54-79.17)   | 90.13 (55.22-147.12)   |                  |
| All-cause mortality      |                       |                        | 0.59 (0.41-0.83) |
| Number of events         | 31                    | 37                     |                  |
| Person-years             | 270.13                | 187.67                 |                  |
| Event rate (95% CI)      | 114.76 (80.71-163.18) | 197.15 (142.85-272.11) |                  |

CI, confidence interval; HR, hazard ratio; NOACs, non-vitamin K antagonist oral anticoagulants.

**Figure S1. Cumulation Distribution of Propensity Score.**

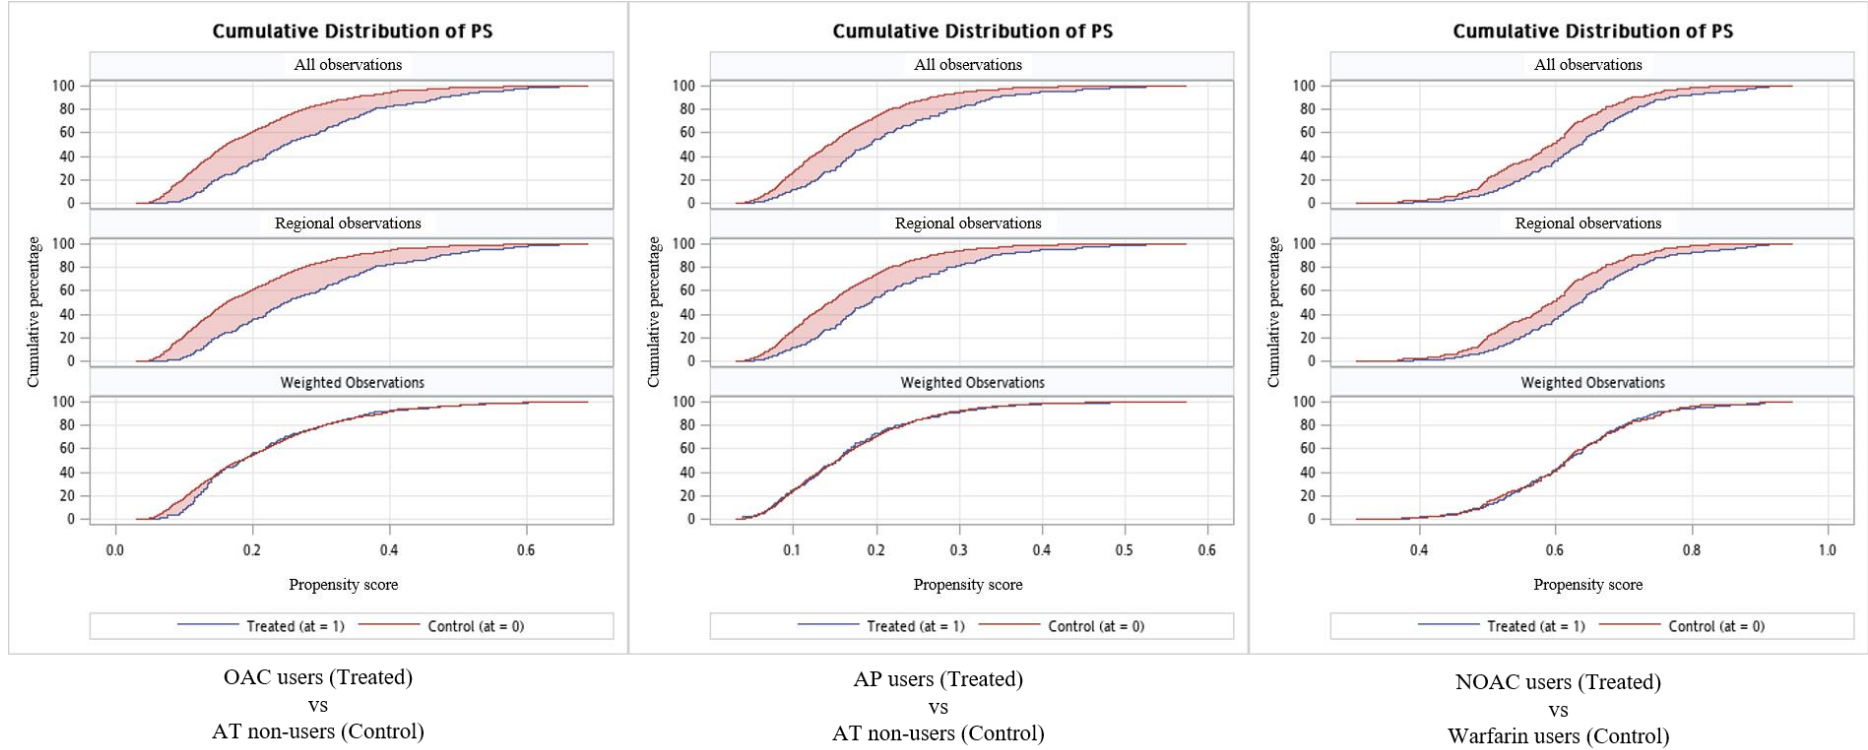

Supplement: JAH3-11-e022849-s001.pdf [file JAH3-11-e022849-s001.pdf]
